# Supplementary material for: Coral restoration: roles of shelter for herbivores and reef state in early recruitment success
Source: PeerJ journal article supplement (doi:10.7717/peerj.20891), 2026-04-07
Supplement: Table_S1.pdf [file Table_S1.pdf]

| Hypothesis              | Model (R Package) | Response Variable              | Scale  | Equation (Response ~ Predictors)                               |
|-------------------------|-------------------|--------------------------------|--------|----------------------------------------------------------------|
| Herbivore               | lmer (lme4)       | Algal overgrowth (AO)          | Module | $AO \sim UB + HFB + R + S + (R \times S) + (1 m) + (1 t)$      |
| Herbivore               | lmer (lme4)       | Coral recruitment (CR)         | Module | $CR \sim UB + HFB + AO + R + S + (R \times S) + (1 m) + (1 t)$ |
| Herbivore               | glmmTMB (glmmTMB) | Coral survival (CS)            | Module | $CS \sim UB + HFB + AO + R + S + (R \times S) + (1 m) + (1 t)$ |
| Herbivore               | lmer (lme4)       | Coral growth (CG)              | Module | $CG \sim UB + HFB + AO + R + S + (R \times S) + (1 m) + (1 t)$ |
| Reefscape/Shelter (R/S) | lmer (lme4)       | Urchin biomass (UB)            | Module | $UB \sim R + S + (R \times S) + (1 m) + (1 t)$                 |
| Reefscape/Shelter (R/S) | lmer (lme4)       | Herbivorous fish biomass (HFB) | Module | $HB \sim R + S + (R \times S) + (1 m) + (1 t)$                 |
| Reefscape/Shelter (R/S) | lmer (lme4)       | Algal overgrowth (AO)          | Colony | $AO \sim R + S + (R \times S) + (1 ID) + (1 m) + (1 t)$        |
| Reefscape/Shelter (R/S) | lmer (lme4)       | Coral recruitment (CR)         | Module | $CR \sim R + S + (R \times S) + (1 m) + (1 t)$                 |
| Reefscape/Shelter (R/S) | glmmTMB (glmmTMB) | Coral survival (CS)            | Module | $CS \sim R + S + (R \times S) + (1 m) + (1 t)$                 |
| Reefscape/Shelter (R/S) | lmer (lme4)       | Coral growth (CG)              | Colony | $CG \sim R + S + (R \times S) + (1 ID) + (1 m) + (1 t)$        |
